# Supplementary material for: Theoretical investigation of the magnetic semiconductor nature in PbI2 monolayer induced by Fe doping
Source: Royal Society of Chemistry journal article supplement (doi:10.1039/d6ra02311h), 2026-06-01
Supplement: d6ra02311h1.pdf [file d6ra02311h1.pdf]

## Theoretical investigation of the magnetic semiconductor nature in $\text{PbI}_2$ monolayer induced by Fe doping

Huynh Thi Phuong Thuy,<sup>1</sup> Do T. Hue,<sup>2</sup> Thi Hue Trinh,<sup>3</sup> Vo Van On,<sup>4</sup> J. Guerrero-Sanchez,<sup>5</sup> and D. M. Hoat<sup>6,7,\*</sup>

<sup>1</sup>Center for Forecasting Study, Institute of Southeast Vietnamese Studies, Thu Dau Mot University, Ho Chi Minh City, Viet Nam

<sup>2</sup>Faculty of Physics, TNU-University of Education, Thai Nguyen, 250000, Viet Nam

<sup>3</sup>Faculty of Electronics and Telecommunications, Electric Power University, No. 235 Hoang Quoc Viet Street, Hanoi, Vietnam

<sup>4</sup>Institute of Innovation in Pharmaceutical and HealthCare Food, Thu Dau Mot University, Ho Chi Minh City, Viet Nam

<sup>5</sup>Universidad Nacional Autonoma de Mexico, Centro de Nanociencias y Nanotecnologia, Apartado Postal 14, Ensenada, Baja California, Codigo Postal 22800, Mexico

<sup>6</sup>Institute of Theoretical and Applied Research, Duy Tan University, Ha Noi 100000, Viet Nam

<sup>7</sup>School of Engineering and Technology, Duy Tan University, Da Nang 550000, Viet Nam

\*Corresponding author: [dominhhoat@duytan.edu.vn](mailto:dominhhoat@duytan.edu.vn)

**Table S1: Computational details.**

| TAG IN INCAR FILE | MEANING                                                                                                  |
|-------------------|----------------------------------------------------------------------------------------------------------|
| ALGO = FAST       | Mixture of the blocked-Davidson and RMM-DIIS algorithms                                                  |
| POTIM = 0.5       | Step width in ionic relaxations                                                                          |
| PREC = ACCURATE   | Precision for the calculations                                                                           |
| ISMEAR = 0        | Gaussian smearing                                                                                        |
| SIGMA = 0.05      | The width of smearing (eV)                                                                               |
| LREAL = AUTO      | Projection operators evaluated in real space                                                             |
| LREAL = .FALSE.   | Projection operators evaluated in reciprocal space (Only for calculations of magnetic anisotropy energy) |
| LASPH = .TRUE.    | Using non-spherical corrections                                                                          |
| ADDGRID = DEFAULT | No additional support grid is used                                                                       |
| SYMPREC = 1.0E-8  | Accuracy the positions in POSCAR file                                                                    |
| QPOINTS           | 8x8x1 (for supercell 4x4x1)                                                                              |
| IBRION = 6        | Finite displacement for phonon calculations                                                              |
| IVDW = 11         | DFT-D3 method of Grimme with zero-damping function                                                       |

**Table S2. Magnetic anisotropy energy ( $\mu\text{eV}$ ) of  $1\text{Fe}@\text{PbI}_2$  monolayer system calculated with different supercell sizes.**

| Supercell | MAE     |
|-----------|---------|
| 2x2x1     | -392.88 |
| 3x3x1     | -369.95 |
| 4x4x1     | -353.23 |
| 5x5x1     | -344.99 |

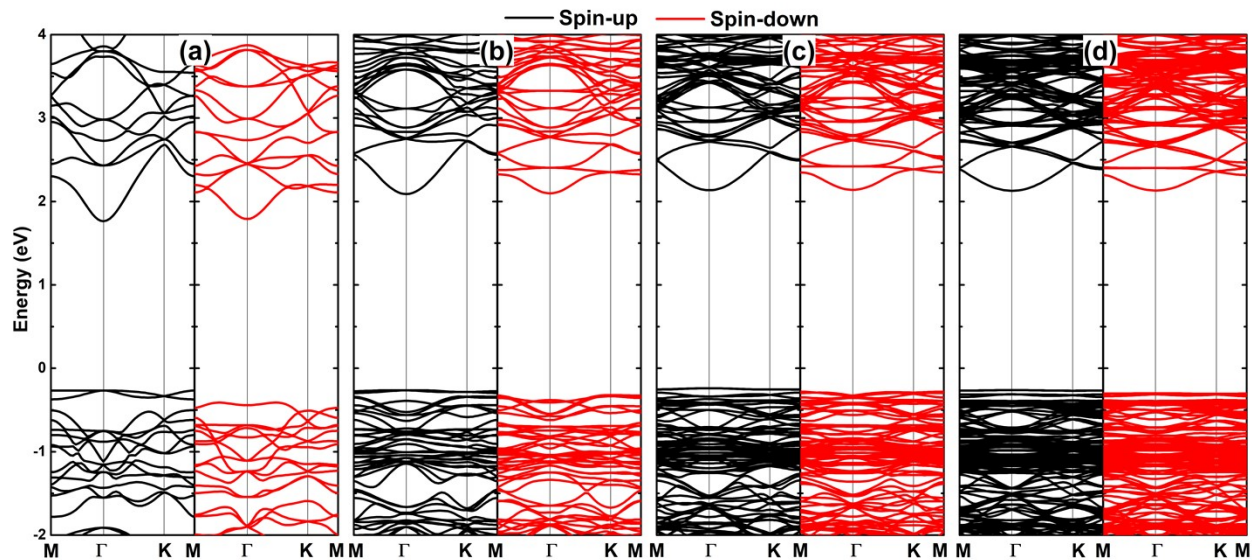

Figure S1: Spin-resolved band structure of 1Fe@PbI<sub>2</sub> monolayer system calculated with (a) 2x2x1, (b) 3x3x1, (c) 4x4x1, and (d) 5x5x1 supercell (The Fermi level is set to 0 eV).

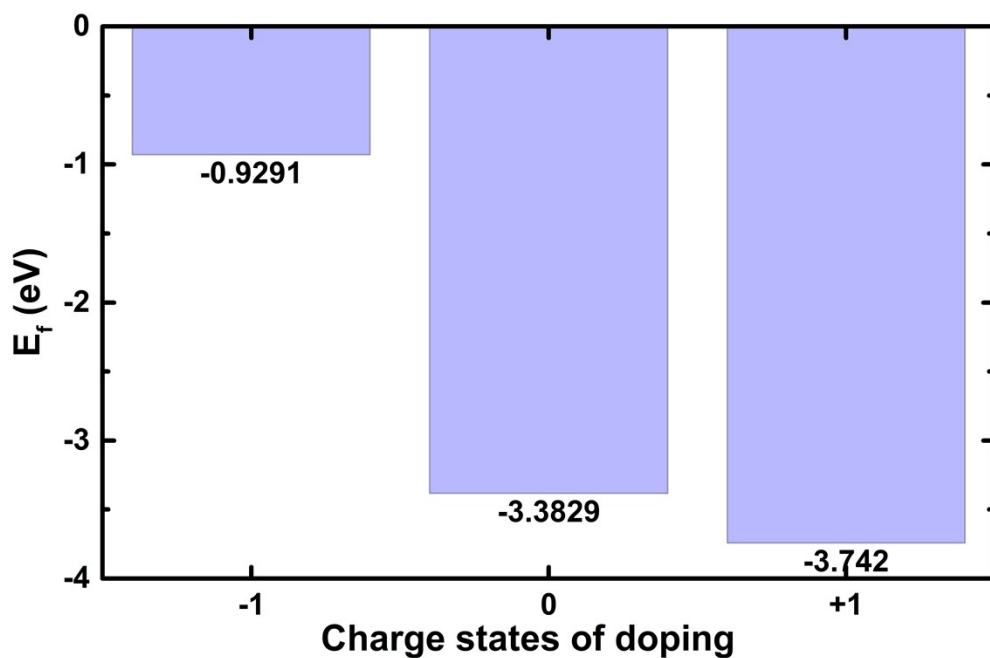

Figure S2: Fermi level of 1Fe@PbI<sub>2</sub> system at different charge states of impurity.

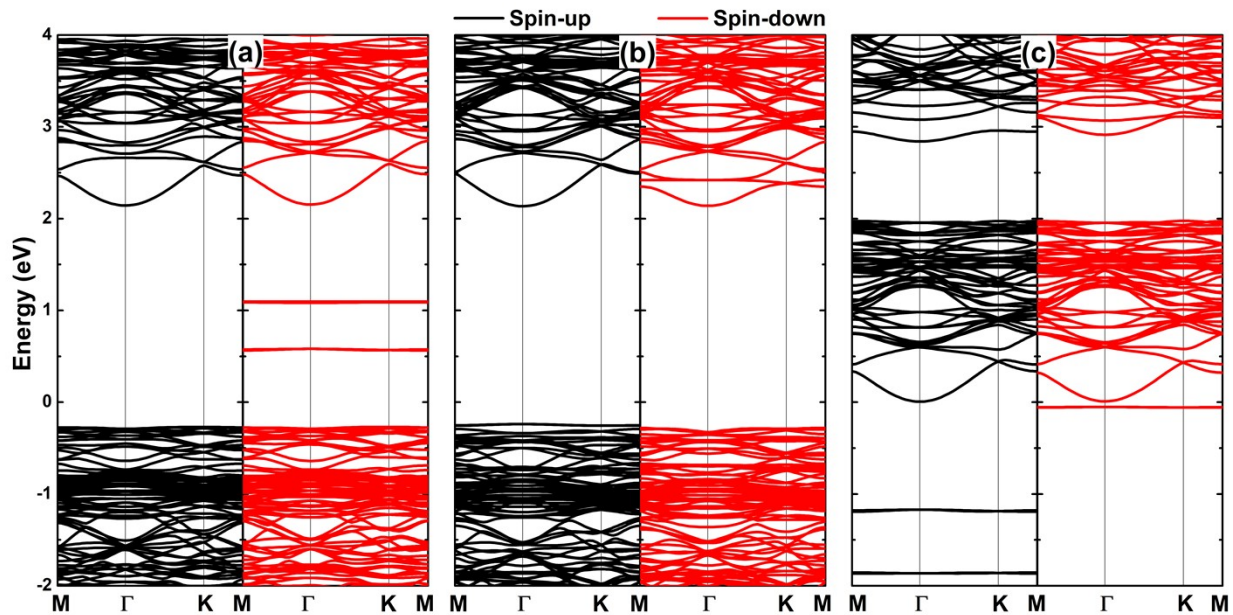

Figure S3: Spin-resolved band structure of 1Fe@PbI<sub>2</sub> monolayer at different charge states of impurity: (a) +1 state, (b) Neutral state, and (c) -1 state (The Fermi level is set to 0 eV in all cases).
